# Supplementary material for: Circulating miR-133a-3p defines a low-risk subphenotype in patients with heart failure and central sleep apnea: a decision tree machine learning approach
Source: Springer Nature journal article supplement (doi:10.1186/s12967-023-04558-w), 2023-10-20
Supplement: MOESM1 [file 12967_2023_4558_MOESM1_ESM.pdf]

## **Additional file Information**

**Additional file 1: Table S1: Baseline characteristics in patients included and not included in the current investigation**

| Variable                                          | Patients included in the SERVE-HF biomarker<br>substudy (n=809) |                 |                    | Patients not included<br>in the current investigation (n=222) |                 |                    | Patients included<br>in current investigation (n=587) |                 |                    | p-value*     |
|---------------------------------------------------|-----------------------------------------------------------------|-----------------|--------------------|---------------------------------------------------------------|-----------------|--------------------|-------------------------------------------------------|-----------------|--------------------|--------------|
|                                                   | N                                                               | Mean ± SD/n (%) | Median (Q1 - Q3)   | N                                                             | Mean ± SD/n (%) | Median (Q1 - Q3)   | N                                                     | Mean ± SD/n (%) | Median (Q1 - Q3)   |              |
| Study intervention group                          | 809                                                             |                 |                    | 222                                                           |                 |                    | 587                                                   |                 |                    | 0.94         |
| Control                                           |                                                                 | 397 (49.1 %)    |                    |                                                               | 108 (48.6 %)    |                    |                                                       | 289 (49.2 %)    |                    |              |
| ASV                                               |                                                                 | 412 (50.9 %)    |                    |                                                               | 114 (51.4 %)    |                    |                                                       | 298 (50.8 %)    |                    |              |
| Country                                           | 809                                                             |                 |                    | 222                                                           |                 |                    | 587                                                   |                 |                    | 0.80         |
| Austria                                           |                                                                 | 29 (3.6 %)      |                    |                                                               | 7 (3.2 %)       |                    |                                                       | 22 (3.7 %)      |                    |              |
| Switzerland                                       |                                                                 | 3 (0.4 %)       |                    |                                                               | 0 (0.0 %)       |                    |                                                       | 3 (0.5 %)       |                    |              |
| Germany                                           |                                                                 | 776 (95.9 %)    |                    |                                                               | 215 (96.8 %)    |                    |                                                       | 561 (95.6 %)    |                    |              |
| Netherlands                                       |                                                                 | 1 (0.1 %)       |                    |                                                               | 0 (0.0 %)       |                    |                                                       | 1 (0.2 %)       |                    |              |
| Age (years)                                       | 809                                                             | 69.3 ± 9.7      | 71 (63 - 76)       | 222                                                           | 68.8 ± 9.6      | 71 (62 - 76)       | 587                                                   | 69.5 ± 9.8      | 71 (63 - 77)       | 0.25         |
| Male                                              | 809                                                             | 734 (90.7 %)    |                    | 222                                                           | 207 (93.2 %)    |                    | 587                                                   | 527 (89.8 %)    |                    | 0.14         |
| Body mass index (kg/m <sup>2</sup> )              | 801                                                             | 28.7 ± 4.9      | 28.3 (25.4 - 31.1) | 219                                                           | 28.8 ± 4.6      | 28.4 (25.5 - 31.2) | 582                                                   | 28.7 ± 5.0      | 28.1 (25.2 - 31.1) | 0.42         |
| NYHA class III/IV                                 | 805                                                             | 589 (73.2 %)    |                    | 222                                                           | 168 (75.7 %)    |                    | 583                                                   | 421 (72.2 %)    |                    | 0.37         |
| LVEF (%)                                          | 581                                                             | 33.2 ± 7.7      | 35 (29 - 40)       | 137                                                           | 32.3 ± 8.0      | 34 (27 - 38)       | 444                                                   | 33.5 ± 7.7      | 35 (29 - 40)       | 0.13         |
| Diabetes                                          | 805                                                             | 316 (39.3 %)    |                    | 222                                                           | 73 (32.9 %)     |                    | 583                                                   | 243 (41.7 %)    |                    | <b>0.024</b> |
| Ischemic HF                                       | 791                                                             | 441 (55.8 %)    |                    | 219                                                           | 115 (52.5 %)    |                    | 572                                                   | 326 (57.0 %)    |                    | 0.26         |
| Systolic blood pressure (mmHg)                    | 798                                                             | 123.7 ± 19.6    | 120 (110 - 136)    | 221                                                           | 122.2 ± 18.6    | 120 (110 - 130)    | 577                                                   | 124.3 ± 19.9    | 120 (110 - 140)    | 0.30         |
| Left bundle-branch-block                          | 794                                                             | 206 (25.9 %)    |                    | 221                                                           | 56 (25.3 %)     |                    | 573                                                   | 150 (26.2 %)    |                    | 0.86         |
| Atrial fibrillation                               | 795                                                             | 232 (29.2 %)    |                    | 221                                                           | 56 (25.3 %)     |                    | 574                                                   | 176 (30.7 %)    |                    | 0.16         |
| Cardiac device                                    | 809                                                             | 437 (54.0 %)    |                    | 222                                                           | 124 (55.9 %)    |                    | 587                                                   | 313 (53.3 %)    |                    | 0.53         |
| Haemoglobin (g/dL)                                | 797                                                             | 14.0 ± 1.6      | 14.1 (13.0 - 15.1) | 220                                                           | 14.2 ± 1.5      | 14.2 (13.1 - 15.3) | 577                                                   | 13.9 ± 1.6      | 14.1 (12.9 - 15.0) | 0.078        |
| eGFR CKD-EPI formula (mL/min/1.73m <sup>2</sup> ) | 790                                                             | 57.9 ± 21.0     | 56.9 (41.9 - 73.6) | 220                                                           | 60.0 ± 20.8     | 58.7 (45.6 - 74.5) | 570                                                   | 57.1 ± 21.0     | 55.8 (40.6 - 72.8) | 0.097        |
| 6-min walk distance (m)                           | 771                                                             | 330.9 ± 124.8   | 343 (253 - 420)    | 213                                                           | 336.0 ± 124.6   | 350 (260 - 420)    | 558                                                   | 329.0 ± 125.0   | 340 (250 - 423)    | 0.53         |
| ACEI or ARB                                       | 809                                                             | 749 (92.6 %)    |                    | 222                                                           | 209 (94.1 %)    |                    | 587                                                   | 540 (92.0 %)    |                    | 0.37         |
| Beta-blocker                                      | 809                                                             | 748 (92.5 %)    |                    | 222                                                           | 211 (95.0 %)    |                    | 587                                                   | 537 (91.5 %)    |                    | 0.10         |
| Aldosterone antagonist                            | 809                                                             | 424 (52.4 %)    |                    | 222                                                           | 131 (59.0 %)    |                    | 587                                                   | 293 (49.9 %)    |                    | <b>0.022</b> |
| Diuretic                                          | 809                                                             | 698 (86.3 %)    |                    | 222                                                           | 189 (85.1 %)    |                    | 587                                                   | 509 (86.7 %)    |                    | 0.57         |
| Cardiac glycoside                                 | 809                                                             | 201 (24.8 %)    |                    | 222                                                           | 51 (23.0 %)     |                    | 587                                                   | 150 (25.6 %)    |                    | 0.47         |
| Antiarrhythmic drug                               | 809                                                             | 143 (17.7 %)    |                    | 222                                                           | 42 (18.9 %)     |                    | 587                                                   | 101 (17.2 %)    |                    | 0.61         |
| Epworth Sleep Scale score                         | 804                                                             | 7.0 ± 4.5       | 6 (4 - 9)          | 218                                                           | 7.2 ± 4.7       | 6 (4 - 10)         | 586                                                   | 6.9 ± 4.4       | 6 (4 - 9)          | 0.51         |
| AHI (n events/hr)                                 | 808                                                             | 30.2 ± 12.5     | 28 (20 - 38)       | 222                                                           | 30.2 ± 12.1     | 28 (20 - 37)       | 586                                                   | 30.3 ± 12.7     | 27 (20 - 38)       | 0.88         |
| Central apnea index/total AHI (%)                 | 808                                                             | 48.1 ± 29.3     | 50 (22 - 73)       | 222                                                           | 49.8 ± 29.2     | 51 (24 - 74)       | 586                                                   | 47.4 ± 29.4     | 48 (22 - 73)       | 0.28         |
| Central AHI/total AHI (%)                         | 808                                                             | 81.0 ± 15.1     | 84 (70 - 94)       | 222                                                           | 81.8 ± 15.4     | 85 (70 - 95)       | 586                                                   | 80.7 ± 15.0     | 84 (69 - 93)       | 0.21         |
| Oxygen Desaturation index                         | 805                                                             | 33.5 ± 18.0     | 32 (20 - 44)       | 220                                                           | 34.2 ± 19.4     | 33 (20 - 46)       | 585                                                   | 33.2 ± 17.4     | 31 (21 - 44)       | 0.54         |

| Variable                               | Patients included in the SERVE-HF biomarker substudy (n=809) |                 |                   | Patients not included in the current investigation (n=222) |                 |                   | Patients included in current investigation (n=587) |                 |                   | p-value* |
|----------------------------------------|--------------------------------------------------------------|-----------------|-------------------|------------------------------------------------------------|-----------------|-------------------|----------------------------------------------------|-----------------|-------------------|----------|
|                                        | N                                                            | Mean ± SD/n (%) | Median (Q1 - Q3)  | N                                                          | Mean ± SD/n (%) | Median (Q1 - Q3)  | N                                                  | Mean ± SD/n (%) | Median (Q1 - Q3)  |          |
| Average oxygen saturation (%)          | 809                                                          | 92.7 ± 2.4      | 93 (92 - 94)      | 222                                                        | 92.5 ± 2.6      | 93 (91 - 94)      | 587                                                | 92.8 ± 2.4      | 93 (92 - 94)      | 0.48     |
| Minimum oxygen saturation (%)          | 808                                                          | 80.6 ± 6.8      | 82 (77 - 85)      | 222                                                        | 80.0 ± 7.2      | 81 (76 - 85)      | 586                                                | 80.9 ± 6.6      | 82 (78 - 85)      | 0.064    |
| Time with oxygen saturation <90% (min) | 803                                                          | 51.4 ± 66.6     | 24 (5 - 70)       | 219                                                        | 59.4 ± 73.5     | 28 (6 - 90)       | 584                                                | 48.4 ± 63.6     | 22 (5 - 65)       | 0.13     |
| Cheyne-Stokes respiration              | 702                                                          |                 |                   | 196                                                        |                 |                   | 506                                                |                 |                   | 0.25     |
| <20%                                   |                                                              | 145 (20.7 %)    |                   |                                                            | 39 (19.9 %)     |                   |                                                    | 106 (20.9 %)    |                   |          |
| 20-50%                                 |                                                              | 278 (39.6 %)    |                   |                                                            | 87 (44.4 %)     |                   |                                                    | 191 (37.7 %)    |                   |          |
| >50%                                   |                                                              | 279 (39.7 %)    |                   |                                                            | 70 (35.7 %)     |                   |                                                    | 209 (41.3 %)    |                   |          |
| NT-proBNP (pg/mL)                      | 794                                                          | 2646 ± 4330     | 1396 (605 - 3066) | 211                                                        | 2451 ± 3127     | 1356 (612 - 3197) | 583                                                | 2717 ± 4691     | 1400 (605 - 3036) | 0.89     |
| Primary outcome                        | 809                                                          | 430 (53.2 %)    |                   | 222                                                        | 119 (53.6 %)    |                   | 587                                                | 311 (53.0 %)    |                   | 0.94     |
| Time to primary outcome (years)        | 809                                                          | 2.4 ± 1.9       | 2.1 (0.6 - 3.7)   | 222                                                        | 2.4 ± 2.0       | 2.1 (0.6 - 4.3)   | 587                                                | 2.3 ± 1.8       | 2.1 (0.7 - 3.6)   | 0.78     |
| Time to follow-up (years)              | 809                                                          | 3.1 ± 1.8       | 3.0 (1.9 - 4.6)   | 222                                                        | 3.2 ± 2.0       | 3.1 (1.5 - 4.9)   | 587                                                | 3.1 ± 1.8       | 3.0 (1.9 - 4.4)   | 0.51     |

N: number of available values; SD: standard deviation; Q1: first quartile; Q3: third quartile.

\* p-value from Wilcoxon test for continuous variables, Fisher's exact test for categorical variables.

ACEI: angiotensin-converting enzyme inhibitors; AHI: apnea hypoapnea index; ARB: angiotensin II receptor blockers; ASV: Adaptive-Servo Ventilation; CV: cardiovascular; HF: heart failure; LVEF: left ventricular ejection fraction; NYHA class: New York Heart Association

**Additional file: 1: Table S2: Baseline characteristics and miRNA levels according to study groups**

| Variable                                          | Overall (n=587) |                     |                     | Control (n=289) |                     |                     | ASV (n=298) |                     |                     | p-value      |
|---------------------------------------------------|-----------------|---------------------|---------------------|-----------------|---------------------|---------------------|-------------|---------------------|---------------------|--------------|
|                                                   | N               | Mean ± SD/<br>n (%) | Median<br>(Q1 - Q3) | N               | Mean ± SD/<br>n (%) | Median<br>(Q1 - Q3) | N           | Mean ± SD/<br>n (%) | Median<br>(Q1 - Q3) |              |
| Age (years)                                       | 587             | 69.5 ± 9.8          | 71 (63 - 77)        | 289             | 69.5 ± 10.2         | 71 (63 - 77)        | 298         | 69.5 ± 9.4          | 71 (64 - 77)        | 0.74         |
| Male                                              | 587             | 527 (89.8 %)        |                     | 289             | 260 (90.0 %)        |                     | 298         | 267 (89.6 %)        |                     | 0.89         |
| Body mass index (kg/m <sup>2</sup> )              | 582             | 28.7 ± 5.0          | 28.1 (25.2 - 31.1)  | 287             | 28.9 ± 5.5          | 28.0 (25.2 - 31.2)  | 295         | 28.5 ± 4.5          | 28.3 (25.2 - 31.0)  | 0.83         |
| NYHA class III/IV                                 | 583             | 421 (72.2 %)        |                     | 287             | 211 (73.5 %)        |                     | 296         | 210 (70.9 %)        |                     | 0.52         |
| LVEF (%)                                          | 444             | 33.5 ± 7.7          | 35 (29 - 40)        | 219             | 33.7 ± 7.4          | 35 (30 - 40)        | 225         | 33.4 ± 7.9          | 35 (29 - 40)        | 0.71         |
| Diabetes                                          | 583             | 243 (41.7 %)        |                     | 287             | 124 (43.2 %)        |                     | 296         | 119 (40.2 %)        |                     | 0.50         |
| Ischemic HF                                       | 572             | 326 (57.0 %)        |                     | 278             | 155 (55.8 %)        |                     | 294         | 171 (58.2 %)        |                     | 0.61         |
| Systolic blood pressure (mmHg)                    | 577             | 124.3 ± 19.9        | 120 (110 - 140)     | 283             | 123.9 ± 19.8        | 120 (110 - 138)     | 294         | 124.6 ± 20.1        | 121 (110 - 140)     | 0.70         |
| Left bundle-branch-block                          | 573             | 150 (26.2 %)        |                     | 283             | 74 (26.1 %)         |                     | 290         | 76 (26.2 %)         |                     | 1.00         |
| Atrial fibrillation                               | 574             | 176 (30.7 %)        |                     | 284             | 77 (27.1 %)         |                     | 290         | 99 (34.1 %)         |                     | 0.071        |
| Cardiac device                                    | 587             | 313 (53.3 %)        |                     | 289             | 152 (52.6 %)        |                     | 298         | 161 (54.0 %)        |                     | 0.74         |
| Haemoglobin (g/dL)                                | 577             | 13.9 ± 1.6          | 14.1 (12.9 - 15.0)  | 284             | 14.0 ± 1.6          | 14.1 (13.0 - 15.1)  | 293         | 13.9 ± 1.6          | 14.1 (12.9 - 15.0)  | 0.63         |
| eGFR CKD-EPI formula (mL/min/1.73m <sup>2</sup> ) | 570             | 57.1 ± 21.0         | 55.8 (40.6 - 72.8)  | 280             | 58.0 ± 21.4         | 56.8 (42.7 - 74.2)  | 290         | 56.3 ± 20.7         | 55.2 (39.5 - 71.1)  | 0.29         |
| 6-min walk distance (m)                           | 558             | 329.0 ± 125.0       | 340 (250 - 423)     | 271             | 331.6 ± 130.7       | 341 (250 - 435)     | 287         | 326.5 ± 119.5       | 330 (250 - 419)     | 0.32         |
| ACEI or ARB                                       | 587             | 540 (92.0 %)        |                     | 289             | 269 (93.1 %)        |                     | 298         | 271 (90.9 %)        |                     | 0.36         |
| Beta-blocker                                      | 587             | 537 (91.5 %)        |                     | 289             | 269 (93.1 %)        |                     | 298         | 268 (89.9 %)        |                     | 0.19         |
| Aldosterone antagonist                            | 587             | 293 (49.9 %)        |                     | 289             | 155 (53.6 %)        |                     | 298         | 138 (46.3 %)        |                     | 0.083        |
| Diuretic                                          | 587             | 509 (86.7 %)        |                     | 289             | 257 (88.9 %)        |                     | 298         | 252 (84.6 %)        |                     | 0.14         |
| Cardiac glycoside                                 | 587             | 150 (25.6 %)        |                     | 289             | 64 (22.1 %)         |                     | 298         | 86 (28.9 %)         |                     | 0.072        |
| Antiarrhythmic drug                               | 587             | 101 (17.2 %)        |                     | 289             | 37 (12.8 %)         |                     | 298         | 64 (21.5 %)         |                     | <b>0.006</b> |
| Epworth Sleep Scale score                         | 586             | 6.9 ± 4.4           | 6 (4 - 9)           | 289             | 6.9 ± 4.6           | 6 (4 - 9)           | 297         | 6.8 ± 4.2           | 6 (4 - 9)           | 0.84         |
| AHI (n events/hr)                                 | 586             | 30.3 ± 12.7         | 27 (20 - 38)        | 289             | 31.1 ± 13.6         | 29 (21 - 38)        | 297         | 29.5 ± 11.8         | 27 (19 - 38)        | 0.25         |
| Central apnea index/total AHI (%)                 | 586             | 47.4 ± 29.4         | 48 (22 - 73)        | 289             | 50.3 ± 29.9         | 53 (24 - 76)        | 297         | 44.6 ± 28.6         | 45 (19 - 67)        | <b>0.018</b> |
| Central AHI/total AHI (%)                         | 586             | 80.7 ± 15.0         | 84 (69 - 93)        | 289             | 81.1 ± 15.2         | 85 (70 - 93)        | 297         | 80.3 ± 14.8         | 82 (68 - 93)        | 0.48         |
| Oxygen Desaturation index                         | 585             | 33.2 ± 17.4         | 31 (21 - 44)        | 287             | 33.8 ± 18.3         | 32 (20 - 44)        | 298         | 32.6 ± 16.6         | 30 (21 - 42)        | 0.43         |
| Average oxygen saturation (%)                     | 587             | 92.8 ± 2.4          | 93 (92 - 94)        | 289             | 92.8 ± 2.5          | 93 (91 - 95)        | 298         | 92.7 ± 2.2          | 93 (92 - 94)        | 0.33         |
| Minimum oxygen saturation (%)                     | 586             | 80.9 ± 6.6          | 82 (78 - 85)        | 289             | 80.5 ± 7.1          | 82 (77 - 86)        | 297         | 81.3 ± 6.2          | 82 (78 - 85)        | 0.45         |
| Time with oxygen saturation <90% (min)            | 584             | 48.4 ± 63.6         | 22 (5 - 65)         | 289             | 50.2 ± 65.9         | 20 (4 - 71)         | 295         | 46.7 ± 61.3         | 23 (7 - 61)         | 0.62         |
| Cheyne-Stokes respiration                         | 506             |                     |                     | 252             |                     |                     | 254         |                     |                     | 0.17         |
| <20%                                              |                 | 106 (20.9 %)        |                     |                 | 55 (21.8 %)         |                     |             | 51 (20.1 %)         |                     |              |
| 20-50%                                            |                 | 191 (37.7 %)        |                     |                 | 85 (33.7 %)         |                     |             | 106 (41.7 %)        |                     |              |

| Variable                        | Overall (n=587) |                     |                       | Control (n=289) |                     |                       | ASV (n=298) |                     |                       | p-value* |
|---------------------------------|-----------------|---------------------|-----------------------|-----------------|---------------------|-----------------------|-------------|---------------------|-----------------------|----------|
|                                 | N               | Mean ± SD/<br>n (%) | Median<br>(Q1 - Q3)   | N               | Mean ± SD/<br>n (%) | Median<br>(Q1 - Q3)   | N           | Mean ± SD/<br>n (%) | Median<br>(Q1 - Q3)   |          |
| >50%                            |                 | 209 (41.3 %)        |                       |                 | 112 (44.4 %)        |                       |             | 97 (38.2 %)         |                       |          |
| NT-proBNP (pg/mL)               | 583             | 2717 ± 4691         | 1400 (605 - 3036)     | 287             | 2649 ± 4557         | 1395 (571 - 3092)     | 296         | 2783 ± 4823         | 1415 (649 - 2990)     | 0.55     |
| miR-133a-3p                     | 584             | 4.14 ± 3.04         | 4.61 (0.21 - 6.67)    | 286             | 4.10 ± 3.00         | 4.65 (0.21 - 6.59)    | 298         | 4.17 ± 3.07         | 4.58 (0.21 - 6.75)    | 0.71     |
| miR-501-3p                      | 557             | 12.51 ± 1.55        | 11.54 (11.54 - 13.56) | 269             | 12.42 ± 1.47        | 11.54 (11.54 - 13.14) | 288         | 12.58 ± 1.61        | 11.54 (11.54 - 13.78) | 0.32     |
| Primary outcome                 | 587             | 311 (53.0 %)        |                       | 289             | 142 (49.1 %)        |                       | 298         | 169 (56.7 %)        |                       | 0.069    |
| Time to primary outcome (years) | 587             | 2.3 ± 1.8           | 2.1 (0.7 - 3.6)       | 289             | 2.5 ± 1.9           | 2.2 (0.7 - 3.9)       | 298         | 2.2 ± 1.7           | 2.0 (0.7 - 3.3)       | 0.054    |
| Time to follow-up (years)       | 587             | 3.1 ± 1.8           | 3.0 (1.9 - 4.4)       | 289             | 3.2 ± 1.8           | 3.0 (2.0 - 4.5)       | 298         | 3.0 ± 1.8           | 2.9 (1.8 - 4.2)       | 0.36     |

N: number of available values; SD: standard deviation; Q1: first quartile; Q3: third quartile.

\*p-value from Wilcoxon test for continuous variables, Fisher's exact test for categorical variables.

ACEI: angiotensin-converting enzyme inhibitors; AHI: apnea hypoapnea index; ARB: angiotensin II receptor blockers; ASV: Adaptive-Servo Ventilation; CV: cardiovascular; HF: heart failure; LVEF: left ventricular ejection fraction; NYHA class: New York Heart Association

### Additional file 1: Table S3: Baseline characteristics according to the primary outcome (Screening)

| Variable                       | Patients in the screening phase (n=20) |                 |                   | Patients without primary outcome (n=10) |                 |                  | Patients with primary outcome (n=10) |                 |                   | p-value* |
|--------------------------------|----------------------------------------|-----------------|-------------------|-----------------------------------------|-----------------|------------------|--------------------------------------|-----------------|-------------------|----------|
|                                | N                                      | Mean ± SD/n (%) | Median (Q1 - Q3)  | N                                       | Mean ± SD/n (%) | Median (Q1 - Q3) | N                                    | Mean ± SD/n (%) | Median (Q1 - Q3)  |          |
| Study intervention group       | 20                                     |                 |                   | 10                                      |                 |                  | 10                                   |                 |                   | 1.00     |
| Control                        |                                        | 12 (60.0 %)     |                   |                                         | 6 (60.0 %)      |                  |                                      | 6 (60.0 %)      |                   |          |
| ASV                            |                                        | 8 (40.0 %)      |                   |                                         | 4 (40.0 %)      |                  |                                      | 4 (40.0 %)      |                   |          |
| Age (years)                    | 20                                     | 66.1 ± 10.5     | 69 (58 - 73)      | 10                                      | 65.4 ± 11.5     | 69 (64 - 73)     | 10                                   | 66.9 ± 10.1     | 67 (58 - 74)      | 0.97     |
| Male                           | 20                                     | 18 (90.0 %)     |                   | 10                                      | 9 (90.0 %)      |                  | 10                                   | 9 (90.0 %)      |                   | 1.00     |
| Diabetes                       | 20                                     | 20 (100.0 %)    |                   | 10                                      | 10 (100.0 %)    |                  | 10                                   | 10 (100.0 %)    |                   | NA       |
| Systolic blood pressure (mmHg) | 20                                     | 119.5 ± 15.2    | 118 (110 - 130)   | 10                                      | 117.7 ± 8.8     | 118 (115 - 120)  | 10                                   | 121.4 ± 20.1    | 118 (110 - 130)   | 1.00     |
| Atrial fibrillation            | 20                                     | 2 (10.0 %)      |                   | 10                                      | 1 (10.0 %)      |                  | 10                                   | 1 (10.0 %)      |                   | 1.00     |
| Cardiac device                 | 20                                     | 10 (50.0 %)     |                   | 10                                      | 5 (50.0 %)      |                  | 10                                   | 5 (50.0 %)      |                   | 1.00     |
| 6-min walk distance (m)        | 18                                     | 368.8 ± 108.2   | 398 (306 - 420)   | 10                                      | 365.5 ± 123.4   | 378 (306 - 420)  | 8                                    | 373.0 ± 94.0    | 410 (320 - 432)   | 0.79     |
| Diuretic                       | 20                                     | 16 (80.0 %)     |                   | 10                                      | 8 (80.0 %)      |                  | 10                                   | 8 (80.0 %)      |                   | 1.00     |
| NT-proBNP (pg/mL)              | 20                                     | 2007 ± 2356     | 1156 (485 - 1989) | 10                                      | 1442 ± 1494     | 680 (359 - 2032) | 10                                   | 2571 ± 2962     | 1553 (719 - 1946) | 0.25     |

N: number of available values; SD: standard deviation; Q1: first quartile; Q3: third quartile.

\*p-value from Wilcoxon test for continuous variables, Fisher's exact test for categorical variables.

ASV: Adaptive-Servo Ventilation

## Additional file 1: Table S4: Baseline characteristics according to the primary outcome (technical validation)

| Variable                 | Patients in the technical validation phase (n=60) |                 |                   | Patients without primary outcome (n=30) |                 |                   | Patients with primary outcome (n=30) |                 |                   | p-value* |
|--------------------------|---------------------------------------------------|-----------------|-------------------|-----------------------------------------|-----------------|-------------------|--------------------------------------|-----------------|-------------------|----------|
|                          | N                                                 | Mean ± SD/n (%) | Median (Q1 - Q3)  | N                                       | Mean ± SD/n (%) | Median (Q1 - Q3)  | N                                    | Mean ± SD/n (%) | Median (Q1 - Q3)  |          |
| Study intervention group | 60                                                |                 |                   | 30                                      |                 |                   | 30                                   |                 |                   | 1.00     |
| Control                  |                                                   | 32 (53.3 %)     |                   |                                         | 16 (53.3 %)     |                   |                                      | 16 (53.3 %)     |                   |          |
| ASV                      |                                                   | 28 (46.7 %)     |                   |                                         | 14 (46.7 %)     |                   |                                      | 14 (46.7 %)     |                   |          |
| Age (years)              | 60                                                | 68.4 ± 9.8      | 71 (61 - 76)      | 30                                      | 68.2 ± 11.2     | 71 (64 - 77)      | 30                                   | 68.6 ± 8.3      | 70 (60 - 75)      | 0.76     |
| Male                     | 60                                                | 58 (96.7 %)     |                   | 30                                      | 29 (96.7 %)     |                   | 30                                   | 29 (96.7 %)     |                   | 1.00     |
| Diabetes                 | 60                                                | 10 (16.7 %)     |                   | 30                                      | 5 (16.7 %)      |                   | 30                                   | 5 (16.7 %)      |                   | 1.00     |
| Atrial fibrillation      | 60                                                | 10 (16.7 %)     |                   | 30                                      | 5 (16.7 %)      |                   | 30                                   | 5 (16.7 %)      |                   | 1.00     |
| Cardiac device           | 60                                                | 32 (53.3 %)     |                   | 30                                      | 16 (53.3 %)     |                   | 30                                   | 16 (53.3 %)     |                   | 1.00     |
| 6-min walk distance (m)  | 56                                                | 324.2 ± 125.1   | 350 (258 - 420)   | 29                                      | 307.2 ± 128.4   | 320 (240 - 396)   | 27                                   | 342.6 ± 121.2   | 380 (267 - 429)   | 0.19     |
| Diuretic                 | 60                                                | 55 (91.7 %)     |                   | 30                                      | 28 (93.3 %)     |                   | 30                                   | 27 (90.0 %)     |                   | 1.00     |
| NT-proBNP (pg/mL)        | 60                                                | 2251 ± 2417     | 1304 (575 - 3448) | 30                                      | 1714 ± 1574     | 1041 (482 - 3232) | 30                                   | 2789 ± 2968     | 1351 (719 - 3687) | 0.19     |

N: number of available values; SD: standard deviation; Q1: first quartile; Q3: third quartile.

\*p-value from Wilcoxon test for continuous variables, Fisher's exact test for categorical variables.

ASV: Adaptive-Servo Ventilation

**Additional file 1: Table S5: Comparison of baseline characteristics according to median value of miR-501-3p**

| Variable                                          | miR-501-3p ≤ median (n=380) |                 |                    | miR-501-3p > median (n=177) |                 |                    | p-value <sup>*</sup> |
|---------------------------------------------------|-----------------------------|-----------------|--------------------|-----------------------------|-----------------|--------------------|----------------------|
|                                                   | N                           | Mean ± SD/n (%) | Median (Q1 - Q3)   | N                           | Mean ± SD/n (%) | Median (Q1 - Q3)   |                      |
| Study intervention group                          | 380                         |                 |                    | 177                         |                 |                    | 0.58                 |
| Control                                           |                             | 187 (49.2 %)    |                    |                             | 82 (46.3 %)     |                    |                      |
| ASV                                               |                             | 193 (50.8 %)    |                    |                             | 95 (53.7 %)     |                    |                      |
| Age (years)                                       | 380                         | 70.0 ± 9.6      | 71 (64 - 77)       | 177                         | 67.9 ± 10.4     | 70 (62 - 76)       | <b>0.036</b>         |
| Male                                              | 380                         | 352 (92.6 %)    |                    | 177                         | 149 (84.2 %)    |                    | <b>0.004</b>         |
| Body mass index (kg/m <sup>2</sup> )              | 376                         | 28.3 ± 4.6      | 27.9 (25.1 - 30.6) | 176                         | 29.5 ± 5.5      | 28.7 (26.0 - 32.0) | 0.020                |
| NYHA class III/IV                                 | 377                         | 275 (72.9 %)    |                    | 176                         | 120 (68.2 %)    |                    | 0.27                 |
| LVEF (%)                                          | 296                         | 34.2 ± 7.7      | 35 (30 - 40)       | 126                         | 31.9 ± 7.3      | 32 (27 - 38)       | <b>0.004</b>         |
| Diabetes                                          | 377                         | 145 (38.5 %)    |                    | 176                         | 82 (46.6 %)     |                    | 0.078                |
| Ischemic HF                                       | 368                         | 216 (58.7 %)    |                    | 175                         | 88 (50.3 %)     |                    | 0.079                |
| Systolic blood pressure (mmHg)                    | 373                         | 124.4 ± 20.9    | 120 (110 - 140)    | 174                         | 124.3 ± 18.0    | 120 (110 - 140)    | 0.91                 |
| Left bundle-branch-block                          | 372                         | 100 (26.9 %)    |                    | 171                         | 45 (26.3 %)     |                    | 0.92                 |
| Atrial fibrillation                               | 372                         | 108 (29.0 %)    |                    | 172                         | 55 (32.0 %)     |                    | 0.48                 |
| Cardiac device                                    | 380                         | 207 (54.5 %)    |                    | 177                         | 94 (53.1 %)     |                    | 0.78                 |
| Haemoglobin (g/dL)                                | 373                         | 13.8 ± 1.6      | 13.9 (12.8 - 15.0) | 174                         | 14.2 ± 1.4      | 14.4 (13.4 - 15.1) | <b>0.002</b>         |
| eGFR CKD-EPI formula (mL/min/1.73m <sup>2</sup> ) | 368                         | 56.2 ± 20.8     | 56.0 (39.8 - 71.2) | 172                         | 59.7 ± 21.3     | 56.1 (44.5 - 77.6) | 0.13                 |
| 6-min walk distance (m)                           | 359                         | 341.9 ± 122.9   | 355 (270 - 430)    | 169                         | 304.4 ± 127.6   | 312 (200 - 405)    | <b>0.002</b>         |
| ACEI or ARB                                       | 380                         | 352 (92.6 %)    |                    | 177                         | 162 (91.5 %)    |                    | 0.73                 |
| Beta-blocker                                      | 380                         | 343 (90.3 %)    |                    | 177                         | 164 (92.7 %)    |                    | 0.43                 |
| Aldosterone antagonist                            | 380                         | 196 (51.6 %)    |                    | 177                         | 83 (46.9 %)     |                    | 0.32                 |
| Diuretic                                          | 380                         | 325 (85.5 %)    |                    | 177                         | 159 (89.8 %)    |                    | 0.18                 |
| Cardiac glycoside                                 | 380                         | 84 (22.1 %)     |                    | 177                         | 51 (28.8 %)     |                    | 0.090                |
| Antiarrhythmic drug                               | 380                         | 62 (16.3 %)     |                    | 177                         | 37 (20.9 %)     |                    | 0.19                 |
| Epworth Sleep Scale score                         | 380                         | 6.6 ± 4.3       | 6 (4 - 9)          | 176                         | 7.2 ± 4.4       | 6 (4 - 10)         | 0.11                 |
| AHI (n events/hr)                                 | 380                         | 30.6 ± 12.7     | 28 (20 - 38)       | 176                         | 29.8 ± 12.9     | 26 (20 - 37)       | 0.39                 |
| Central apnea index/total AHI (%)                 | 380                         | 46.7 ± 29.5     | 46 (21 - 73)       | 176                         | 48.9 ± 28.9     | 52 (24 - 74)       | 0.39                 |
| Central AHI/total AHI (%)                         | 380                         | 80.0 ± 14.8     | 82 (67 - 93)       | 176                         | 82.5 ± 15.4     | 86 (72 - 96)       | <b>0.029</b>         |
| Oxygen Desaturation index                         | 378                         | 33.9 ± 18.0     | 32 (21 - 44)       | 177                         | 32.1 ± 16.6     | 30 (20 - 43)       | 0.40                 |
| Average oxygen saturation (%)                     | 380                         | 92.8 ± 2.3      | 93 (92 - 94)       | 177                         | 92.7 ± 2.5      | 93 (91 - 94)       | 0.71                 |
| Minimum oxygen saturation (%)                     | 379                         | 81.0 ± 6.9      | 82 (78 - 86)       | 177                         | 80.3 ± 6.3      | 82 (77 - 85)       | 0.080                |
| Time with oxygen saturation <90% (min)            | 377                         | 46.4 ± 62.4     | 21 (4 - 62)        | 177                         | 54.3 ± 68.3     | 26 (7 - 79)        | 0.11                 |
| Cheyne-Stokes respiration                         | 333                         |                 |                    | 147                         |                 |                    | 0.39                 |



| Variable                         | miR-501-3p ≤ median (n=380) |                 |                   | miR-501-3p > median (n=177) |                 |                   | p-value*          |
|----------------------------------|-----------------------------|-----------------|-------------------|-----------------------------|-----------------|-------------------|-------------------|
|                                  | N                           | Mean ± SD/n (%) | Median (Q1 - Q3)  | N                           | Mean ± SD/n (%) | Median (Q1 - Q3)  |                   |
| <20%                             |                             | 72 (21.6 %)     |                   |                             | 30 (20.4 %)     |                   |                   |
| 20-50%                           |                             | 129 (38.7 %)    |                   |                             | 49 (33.3 %)     |                   |                   |
| >50%                             |                             | 132 (39.6 %)    |                   |                             | 68 (46.3 %)     |                   |                   |
| NT-proBNP (pg/mL)                | 377                         | 2835 ± 4504     | 1439 (607 - 3226) | 176                         | 2483 ± 5059     | 1328 (566 - 2446) | 0.13              |
| Primary outcome                  | 380                         | 200 (52.6 %)    |                   | 177                         | 95 (53.7 %)     |                   | 0.86              |
| Time to primary endpoint (years) | 380                         | 2.2 ± 1.8       | 2.1 (0.5 - 3.4)   | 177                         | 2.6 ± 2.0       | 2.2 (0.9 - 4.0)   | 0.055             |
| Time to follow-up (years)        | 380                         | 2.9 ± 1.7       | 2.8 (1.7 - 4.0)   | 177                         | 3.6 ± 1.8       | 3.9 (2.1 - 5.0)   | <b>&lt;0.0001</b> |

N: number of available values; SD: standard deviation; Q1: first quartile; Q3: third quartile.

\*p-value from Wilcoxon test for continuous variables, Fisher's exact test for categorical variables.

### Additional file 1: Table S6: C-index for miRNAs and NT-proBNP

| Subgroup       | miRNA          | C-index (95% CI)      | p-value           |
|----------------|----------------|-----------------------|-------------------|
| <b>Overall</b> | miR-133a-3p    | 0.561 (0.527 - 0.594) | <b>0.0004</b>     |
|                | miR-501-3p     | 0.515 (0.486 - 0.544) | 0.31              |
|                | Log(NT-proBNP) | 0.693 (0.664 - 0.722) | <b>&lt;0.0001</b> |
| <b>Control</b> | miR-133a-3p    | 0.561 (0.510 - 0.613) | <b>0.020</b>      |
|                | miR-501-3p     | 0.529 (0.485 - 0.574) | 0.19              |
|                | Log(NT-proBNP) | 0.713 (0.671 - 0.755) | <b>&lt;0.0001</b> |
| <b>ASV</b>     | miR-133a-3p    | 0.565 (0.521 - 0.610) | <b>0.004</b>      |
|                | miR-501-3p     | 0.507 (0.468 - 0.547) | 0.72              |
|                | Log(NT-proBNP) | 0.674 (0.633 - 0.715) | <b>&lt;0.0001</b> |

ASV : Adaptive-Servo Ventilation; CI: confidence interval.

Additional file 1: **Table S7. Number of participants with event (Positive) within time points (1, 3 and 5 years), and those without event.**

|                | 1 Year   |          | 3 Year   |          | 5 Year   |          |
|----------------|----------|----------|----------|----------|----------|----------|
|                | Positive | Negative | Positive | Negative | Positive | Negative |
| <b>Node 6</b>  | 1        | 69       | 10       | 45       | 12       | 18       |
| <b>Node 7</b>  | 2        | 22       | 7        | 10       | 9        | 2        |
| <b>Node 8</b>  | 9        | 64       | 21       | 34       | 25       | 14       |
| <b>Node 9</b>  | 11       | 49       | 26       | 24       | 33       | 10       |
| <b>Node 10</b> | 24       | 81       | 47       | 43       | 54       | 13       |
| <b>Node 11</b> | 35       | 45       | 53       | 17       | 60       | 1        |
| <b>Node 12</b> | 24       | 42       | 42       | 16       | 45       | 4        |
| <b>Node 13</b> | 46       | 29       | 63       | 8        | 66       | 1        |
| <b>Total</b>   | 155      | 401      | 269      | 197      | 304      | 63       |

Those without event and without enough follow-up (censored with a follow-time below the considered point) are removed from both the Positive and the Negative groups.

Additional file 1: **Table S8. Classification metrics at different time points.**

|                             | <b>1 Year</b>              | <b>3 Year</b>                  | <b>5 Year</b>                     |
|-----------------------------|----------------------------|--------------------------------|-----------------------------------|
| <b>Positivity criteria</b>  | <b>Nodes 10, 11, 12,13</b> | <b>Nodes 9, 10, 11, 12, 13</b> | <b>Nodes 8, 9, 10, 11, 12, 13</b> |
| <b>Sensitivity (Recall)</b> | 83.2%                      | 85.9%                          | 93.1%                             |
| <b>Specificity</b>          | 50.9%                      | 45.2%                          | 31.7%                             |
| <b>PPV (Precision)</b>      | 39.6%                      | 68.1%                          | 72.7%                             |
| <b>PNV</b>                  | 89.9%                      | 70.1%                          | 48.8%                             |
| <b>F1-Score</b>             | 54.0%                      | 76.0%                          | 81.7%                             |
| <b>Accuracy</b>             | 59.9%                      | 63.9%                          | 82.6%                             |

PPV: Predictive Positive Value. PNV: Predictive Negative Value  
 Positive criteria define the Nodes predicting patients as positive.  
 Numbers based on those reported in the previous table.

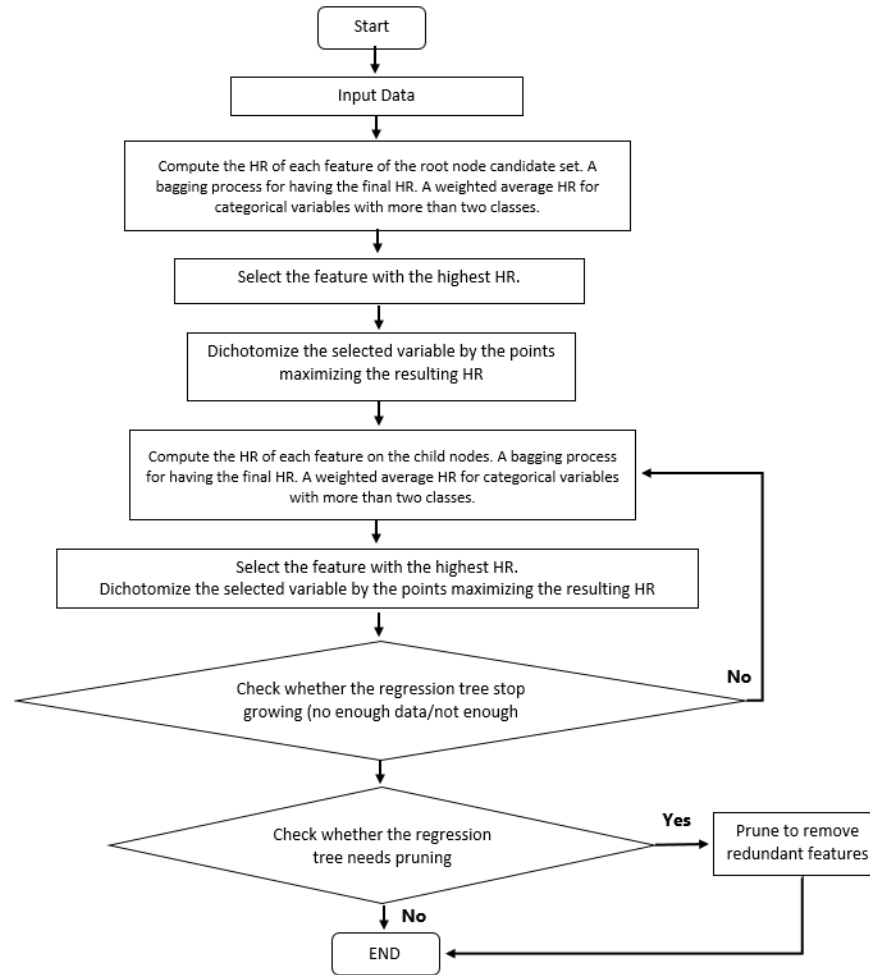

Additional file 1: **Figure S1. Flow-diagram for the customized-CART algorithm.**

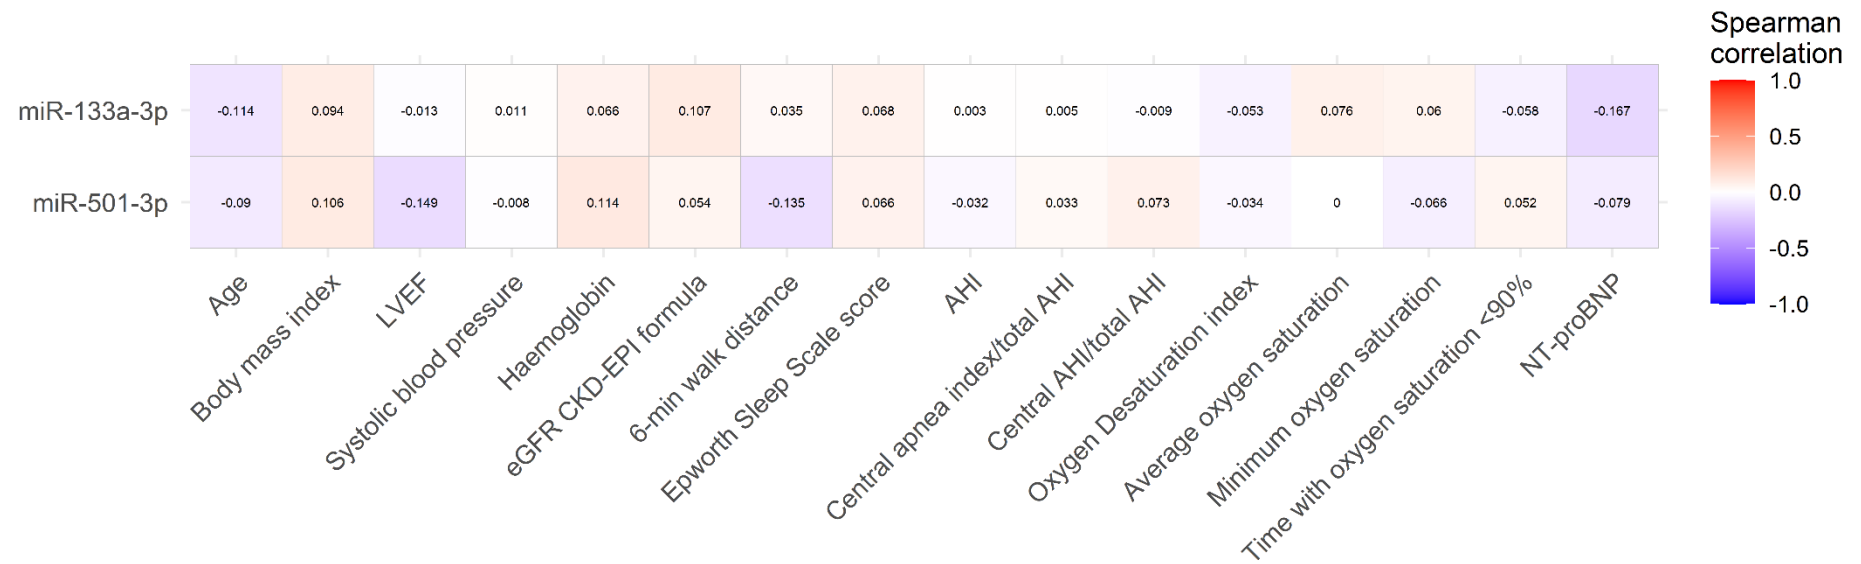

Additional file 1: **Figure S2. Correlation coefficient maps between microRNA expression levels and baseline clinical characteristics.** Correlations between continuous variables were assessed with Spearman rank correlation coefficients, represented as rho values.
